# Supplementary material for: A comparative analysis of preservation techniques for the optimal molecular detection of hookworm DNA in a human fecal specimen
Source: PLoS Negl Trop Dis. 2018 Jan 18;12(1):e0006130. doi: 10.1371/journal.pntd.0006130 (PMC5773002; doi:10.1371/journal.pntd.0006130)
Supplement: S4 Table — The first column shows the method of preservation employed (indexed by j). In the second column, the value in the first row is exp(α0) and the values in all subsequent rows are exp(α1j). These are exponentiated coefficients associated with each treatment upon initial application of the preservative (measured by Cq values). Each coefficient (except for the first one) shows how much higher than the control/”no preservative” treatment the estimated Cq value is, at time zero (t = 0) when that method is employed. FTA cards are 41% higher than the control, which is 15.66 (the standard errors associated with each of the coefficients are in the parentheses). The term “Relative Initial Effect” corresponds to the Cq difference relative to the control upon application of the preservative (at time t = 0). The third column shows the 95% confidence interval associated with each of the estimated coefficients in the second column. The fourth column includes the exponentiated coefficients associated with each treatment per day of storage, measured by Cq values (the standard errors associated with each of the coefficients are in the parentheses). Each coefficient (except for the first one) shows how much higher the Cq value is expected to be for each additional day of storage when this particular treatment is employed. For instance, the coefficient for the FTA cards is 0.9956, but the respective coefficient for the control/”no preservative” treatment is 1.0045, so the overall effect is about 1. This can be interpreted to mean that the influence of FTA card storage effectively offsets the decay of the DNA target seen in the control/”no preservative” treatment. We have coined this the “Relative Daily Effect” which corresponds to the increase in sample Cq value relative to the increase in Cq value of the control per day of storage. The fifth column shows the confidence intervals associated with each of the estimated coefficients in the fourth column. FTA cards are the only preservation [file pntd.0006130.s004.xlsx]

## Sheet: S4 table
S4 Table. Coefficients from the GLM along with their standard errors (SE) at 32 oC
Preservation Method (j)	Relative Initial Effect (baseline) exp(α) (SE)	exp(α) 95 % CI	Relative Daily Effect exp(βj) (SE )	exp(β) 95 % CI
Control	15.6599 (0.0573)	[13.9717, 17.491]	1.0045 (0.0016)	[1.0014, 1.0077]
5% potassium dichromate	0.9425 (0.0638)	[0.8327, 1.0695]	0.9975 (0.0018)	[0.994, 1.001]
95% ethanol	1.0365 (0.0632)	[0.917, 1.1748]	0.9989 (0.0018)	[0.9955, 1.0024]
Formalternate	0.9501 (0.0635)	[0.8401, 1.0775]	1.0031 (0.0018)	[0.9997, 1.0066]
FTA cards	1.4106 (0.0618)	[1.2515, 1.5946]	0.9956 (0.0017)	[0.9923, 0.999]
Paxgene	1.0354 (0.0632)	[0.916, 1.1735]	0.9993 (0.0018)	[0.9959, 1.0028]
RNA later	1.0403 (0.0632)	[0.9204, 1.1791]	0.9987 (0.0018)	[0.9953, 1.0022]
Silica beads- 2 step desiccation	1.1265 (0.0629)	[0.9972, 1.276]	0.9959 (0.0018)	[0.9925, 0.9994]
